# Supplementary material
Source: PubMed Central journal article supplement (PMC4511079)
Supplement: Supp_Data.pdf [file Supp_Data.pdf]

# Supplementary Data

SUPPLEMENTARY TABLE S1. STUDY GROUP CHILDREN<sup>1</sup>

|                                 | <i>RV + GE</i> (n = 24) <sup>a</sup> | <i>RV - GE</i> (n = 12) <sup>b</sup> |
|---------------------------------|--------------------------------------|--------------------------------------|
| Age (months) <sup>c</sup>       | 15 (3–35)                            | 15 (7–22)                            |
| Sex (Male/Female)               | 15/9                                 | 7/5                                  |
| % Breastfed                     | 50                                   | 25                                   |
| DAOD <sup>d</sup>               | 3 (0.7–10)                           | 4.5 (3–10)                           |
| Moderate/severe GE <sup>e</sup> | 1/24                                 | 1/11                                 |

<sup>1</sup>Stool samples contained<sup>a</sup> or did not contain<sup>b</sup> RV antigen as determined by ELISA and PCR. <sup>c</sup>Median (range). <sup>d</sup>DAOD: days after onset of diarrhea. <sup>e</sup>Severe GE 11–20 points, Moderate GE 7–10 points Ruuskas scale (Rojas et al, 2007. *Viral Immunol* 20:300–311). No statistical differences were seen between the two groups.

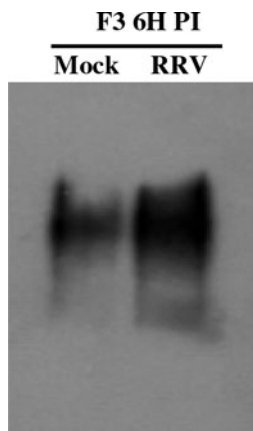

**SUPPLEMENTARY FIG. 1.** CD63 detection by WB of F3 prepared from supernatants of Caco-2 cells 6 h after mock treatment or RRV infection is shown.
